# Supplementary material
Source: Springer Nature journal article supplement (https://www.springermedizin.de/resource/supplementary/12985_2010_823_MOESM2_ESM.pdf/9609268)

1 2 3 4

bp

2000

1000

750

500

250

100

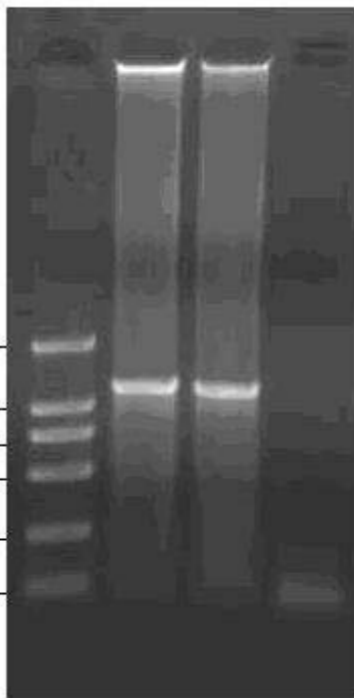

Supplement: MOESM2 [file 9609268]
